# Supplementary material for: SARS-CoV-2 Antibody Dynamics after COVID-19 Vaccination and Infection: A Real-World Cross-Sectional Analysis
Source: MDPI journal article supplement (doi:10.3390/vaccines11071184), 2023-06-30
Supplement: s1 [file s1]

**Table S1.** Antibody levels stratified by the interval from the last dose vaccination and blood sampling. The antibody was classified by time since the last dose (days). GMR calculation is performed using the preceding timeline as a referent.

|                                      | 2-dose                   | 3-dose                   | 4-dose                  |
|--------------------------------------|--------------------------|--------------------------|-------------------------|
| No history of infection<br>(n, 3748) |                          |                          |                         |
| Pooled                               | 171.1 (159.3, 185.1)     | 8013 (7646, 8398)        | 9353 (7935, 11,026)     |
| 14-45 days                           | 232.3 (206.1, 261.9)     | 9122 (8699, 9566)        | 14,413 (11,738, 17,696) |
|                                      | <b>0.64X, p&lt;0.001</b> | <b>0.77X, p0.037</b>     | 0.85X, p>0.999          |
| 46-75 days                           | 148.5 (132.2, 166.7)     | 6982 (5942, 8204)        | 12,237 (7431, 20,152)   |
|                                      | 0.87X, p>0.999           | <b>0.44X, p&lt;0.001</b> | 0.51X, p0.432           |
| 76-105 days                          | 128.9 (106.1, 156.6)     | 3091 (2528, 3779)        | 6251 (4025, 9708)       |
|                                      | 0.83X, p>0.999           | 0.71X, p0.530            | 0.71X, p>0.999          |
| 106-135 days                         | 107.0 (76.56, 149.4)     | 2205 (1722, 2822)        | 4415 (2714, 7181)       |
|                                      | 0.99X, p>0.999           | 0.69X, p0.808            | 0.82X, p>0.999          |
| 136-165 days                         | 106.1 (59.44, 189.5)     | 1512 (1017, 2249)        | 3632 (2713, 4863)       |
|                                      | <b>4.60X, p0.019</b>     | 1.40X, p0.783            | 1.05X, p>0.999          |
| > 165 days                           | 487.8 (242.4, 981.7)     | 2117 (1714, 2249)        | 3816 (2696, 5400)       |
| Had history of infection<br>(n, 220) |                          |                          |                         |
| Pooled                               | 11,689 (8787, 15,549)    | 11,541 (9225, 14,438)    | 19,205 (14,145, 26,075) |
| 15-45 days                           | 5824 (2202, 15,404)      | 9987 (5553, 17,963)      | 20,950 (15,096, 29,074) |
|                                      | 1.00X, p>0.999           | 1.56X, p>0.999           | 1.41X, p>0.999          |
| 46-75 days                           | 5830 (2574, 13,205)      | 15,554 (7267, 33,291)    | 29,514*                 |
|                                      | 0.78X, p>0.999           | 0.94X, p>0.999           |                         |
| 76-105 days                          | 4569 (1856, 11,251)      | 14,600 (10,410, 20,478)  | 0.66X, p>0.999          |
|                                      | <b>3.77X, p0.035</b>     | 0.52X, p>0.999           |                         |
| 106-135 days                         | 17,202 (11,846, 24,980)  | 7529 (931.6, 60,850)     | 19,577*                 |
|                                      | 1.00X, p>0.999           | 2.32X, p>0.999           | 0.74X, p>0.999          |
| 136-165 days                         | 17,235 (8907, 33,350)    | 17,434 (4369, 69,572)    | 15,651*                 |
|                                      | 1.16X, p>0.999           | 0.53X, p>0.999           | 0.93X, p>0.999          |
| > 165 days                           | 19,952 (7597, 52,396)    | 8780 (5540, 13,915)      | 14,481 (5799, 36,159)   |

\* n less than 4 were not calculated the 95%CI. The bold value is statistically significant.

**Table S2.** Geometric mean ratios of Ig anti-RBD between groups of participants stratified by status of infection and number of vaccine doses. The antibody was classified by time since last dose (days).

|                                            | 2-dose                     | 3-dose<br>vs 2-<br>dose,<br>GMR, <i>p</i> -<br>value | 3-dose                     | 4-dose<br>vs 3-<br>dose,<br>GMR, <i>p</i> -<br>value | 4-dose                     | 4-dose<br>vs 2-<br>dose,<br>GMR, <i>p</i> -<br>value |
|--------------------------------------------|----------------------------|------------------------------------------------------|----------------------------|------------------------------------------------------|----------------------------|------------------------------------------------------|
| No history of infection ( <i>n</i> , 3748) |                            |                                                      |                            |                                                      |                            |                                                      |
| Pooled                                     | 171.1<br>(159.3, 185.1)    | <b>46.67X</b> ,<br><i>p</i> <0.001                   | 8013<br>(7646, 8398)       | 1.17X,<br><i>p</i> 0.428                             | 9353<br>(7935, 11,026)     | <b>54.45X</b> ,<br><i>p</i> <0.001                   |
| 15-45 days                                 | 232.3<br>(206.1, 261.9)    | <b>39.26X</b> ,<br><i>p</i> <0.001                   | 9122<br>(8699, 9566)       | <b>1.58X</b> ,<br><i>p</i> 0.001                     | 14,413<br>(11,738, 17,696) | <b>62.09X</b> ,<br><i>p</i> <0.001                   |
| 46-75 days                                 | 148.5<br>(132.2, 166.7)    | <b>47.00X</b> ,<br><i>p</i> <0.001                   | 6982<br>(5942, 8204)       | 1.75X,<br><i>p</i> 0.414                             | 12,237<br>(7431, 20,152)   | <b>82.41X</b> ,<br><i>p</i> <0.001                   |
| 76-105 days                                | 128.9<br>(106.1, 156.6)    | <b>24.00X</b> ,<br><i>p</i> <0.001                   | 3091<br>(2528, 3779)       | 2.02X,<br><i>p</i> 0.169                             | 6251<br>(4025, 9708)       | <b>48.53X</b> ,<br><i>p</i> <0.001                   |
| 106-135 days                               | 107.0<br>(76.56, 149.4)    | <b>20.61X</b> ,<br><i>p</i> <0.001                   | 2205<br>(1722, 2822)       | 2.00X,<br><i>p</i> 0.133                             | 4415<br>(2714, 7181)       | <b>41.30X</b> ,<br><i>p</i> <0.001                   |
| 136-165 days                               | 106.1<br>(59.44, 189.5)    | <b>14.26X</b> ,<br><i>p</i> <0.001                   | 1512<br>(1017, 2249)       | <b>2.40X</b> ,<br><i>p</i> 0.038                     | 3632<br>(2713, 4863)       | <b>34.20X</b> ,<br><i>p</i> <0.001                   |
| > 165 days                                 | 487.8<br>(242.4, 981.7)    | <b>4.34X</b> ,<br><i>p</i> <0.001                    | 2117<br>(1714, 2249)       | <b>1.80X</b> ,<br><i>p</i> 0.019                     | 3816<br>(2696, 5400)       | <b>7.82X</b> ,<br><i>p</i> <0.001                    |
| Had history of infection ( <i>n</i> , 220) |                            |                                                      |                            |                                                      |                            |                                                      |
| Pooled                                     | 11,689<br>(8787, 15,549)   | 0.99X,<br><i>p</i> >0.999                            | 11,541<br>(9225, 14,438)   | 1.66X,<br><i>p</i> 0.271                             | 19,205<br>(14,145, 26,075) | 1.64X,<br><i>p</i> 0.217                             |
| 15-45 days                                 | 5824<br>(2202, 15,404)     | 1.71X,<br><i>p</i> 0.622                             | 9987<br>(5553, 17,963)     | 2.10X,<br><i>p</i> 0.195                             | 20,950<br>(15,096, 29,074) | <b>3.60X</b> ,<br><i>p</i> 0.011                     |
| 46-75 days                                 | 5830<br>(2574, 13,205)     | 2.67X,<br><i>p</i> 0.220                             | 15,554<br>(7267, 33,291)   | 1.90X,<br><i>p</i> >0.999                            | 29,514*                    | 5.06X,<br><i>p</i> 0.249                             |
| 76-105 days                                | 4569<br>(1856, 11,251)     | <b>3.20X</b> ,<br><i>p</i> 0.018                     | 14,600<br>(10,410, 20,478) | N/A                                                  | N/A                        | N/A                                                  |
| 106-135 days                               | 17,202<br>(11,846, 24,980) | 0.44X,<br><i>p</i> 0.781                             | 7529<br>(931.6, 60,850)    | 2.60X,<br><i>p</i> >0.999                            | 19,577*                    | 1.14X,<br><i>p</i> >0.999                            |
| 136-165 days                               | 17,235<br>(8907, 33,350)   | 1.01X,<br><i>p</i> >0.999                            | 17,434<br>(4369, 69,572)   | 0.90X,<br><i>p</i> >0.999                            | 15,651*                    | 0.91X,<br><i>p</i> >0.999                            |
| > 165 days                                 | 19,952<br>(7597, 52,396)   | 0.44X,<br><i>p</i> 0.171                             | 8780<br>(5540, 13,915)     | 1.65X,<br><i>p</i> 0.909                             | 14,481<br>(5799, 36,159)   | 0.73X,<br><i>p</i> >0.999                            |

\* n less than 4 were not calculated the 95%CI. The bold is statistically significant.
